# Supplementary material for: Spiegelmer-Based Sandwich Assay for Cardiac Troponin I Detection
Source: PubMed Central journal article supplement (PMC7404307; doi:10.3390/ijms21144963), 2020-07-14
Supplement: ijms-21-04963-s001.pdf [file ijms-21-04963-s001.pdf]

## SUPPLEMENTARY DATA

# Spiegelmer-based sandwich assay for cardiac troponin I Detection

Zoltán János Tolnai <sup>1</sup>, Judit András <sup>1</sup>, Zsuzsanna Szeitner <sup>1</sup>, Krisztina Percze <sup>1</sup>, László Ferenc Simon <sup>2</sup>,  
Róbert E. Gyurcsányi <sup>2</sup> and Tamás Mészáros<sup>2,\*</sup>

<sup>1</sup> Department of Medical Chemistry, Molecular Biology and Pathobiochemistry, Semmelweis University,  
Tűzoltó u. 37-47., H-1094, Budapest, Hungary;

<sup>2</sup> BME "Lendület" Chemical Nanosensors Research Group, Department of Inorganic and Analytical Chemistry,  
Budapest University of Technology and Economics, Szt. Gellért tér 4, H-1111 Budapest, Hungary

\* Correspondence: meszaros.tamas@med.semmelweis-univ.hu

**Supplementary Table 1.** L-Nucleic acid sequences of the studied spiegelmers.

| Name        | Sequence                                                                                                       |
|-------------|----------------------------------------------------------------------------------------------------------------|
| B10         | 5'-AGT CTC CGC TGT CCT CCC GAT GCA CTT GAC GTA TGT CTC<br>ACT TTC TTT TCA TTG ACA TGG GAT GAC GCC GTG ACT G-3' |
| A6          | 5'-CAG TGA GTG ATG GTG AGG GCT TAG TTC GCC GCT CAT GCC<br>GAA TCT CCT GTA TAA ATA CCC ACA CTG TCC ATA CAC G-3' |
| C6          | 5'-CAG TGA GTG ATG GTG AGG GTG AAT CGG TGT CGA CTA TTA<br>AAT TAA GTT GTG GTT GTT CCC ACA CTG TCC ATA CAC G-3' |
| C6<br>short | 5'-TG AAT CGG TGT CGA CTA TTA AAT TAA GTT GTG GTT GTT-3'                                                       |

**Supplementary Table 2.** Conditions of SELEX cycles.

| SELEX cycle number | Amount of target molecules      | Incubation time | Buffer composition                                                                                                    | Washing steps                               |
|--------------------|---------------------------------|-----------------|-----------------------------------------------------------------------------------------------------------------------|---------------------------------------------|
| 1. Counter-SELEX   | -                               | 1 hour          | 2 mL PBS                                                                                                              | -                                           |
| 1.                 | 500 pmol cTnl peptide           | 1 hour          | Supernatant of the 1. counter-SELEX<br>1 mg mL <sup>-1</sup> BSA<br>0.01 µg mL <sup>-1</sup> poly (dl-dC)<br>5mM EDTA | 3x100 µL PBS                                |
| 2.                 | 375 pmol cTnl peptide           | 30 min          | 2 mL PBS<br>1 mg mL <sup>-1</sup> BSA<br>0.01 µg mL <sup>-1</sup> poly (dl-dC)<br>5mM EDTA                            | 3x100 µL PBS                                |
| 3.                 | 375 pmol cTnl peptide           | 30 min          | 2 mL PBS<br>1 mg mL <sup>-1</sup> BSA<br>0.1 µg mL <sup>-1</sup> poly (dl-dC)<br>5 mM EDTA                            | 3x100 µL PBS                                |
| 4.                 | 250 pmol cTnl peptide           | 30 min          | 2 mL PBS<br>1 mg mL <sup>-1</sup> BSA<br>0.1 µg mL <sup>-1</sup> poly (dl-dC)<br>5 mM EDTA                            | 3x5 min, 100 µL PBS                         |
| 2. Counter-SELEX   | 400 µg cTnl free serum proteins | 1 hour          | 2 mL PBS<br>1 mg mL <sup>-1</sup> BSA                                                                                 |                                             |
| 5.                 | 250 pmol cTnl peptide           | 30 min          | Supernatant of the 2. counter-SELEX<br>0.1 µg mL <sup>-1</sup> poly (dl-dC)<br>5 mM EDTA                              | 3x5 min, 100 µL PBS                         |
| 6.                 | 250 pmol cTnl peptide           | 15 min          | 2 mL PBS<br>1 mg mL <sup>-1</sup> BSA<br>0.1 µg mL <sup>-1</sup> poly (dl-dC)<br>5 mM EDTA                            | 3x5 min, 100 µL PBS                         |
| 7.                 | 250 pmol cTnl peptide           | 15 min          | 2 mL PBS<br>1 mg mL <sup>-1</sup> BSA<br>0.1 µg mL <sup>-1</sup> poly (dl-dC)<br>5 mM EDTA                            | 3x5 min, 100 µL PBS, 0.3 mM dextran sulfate |

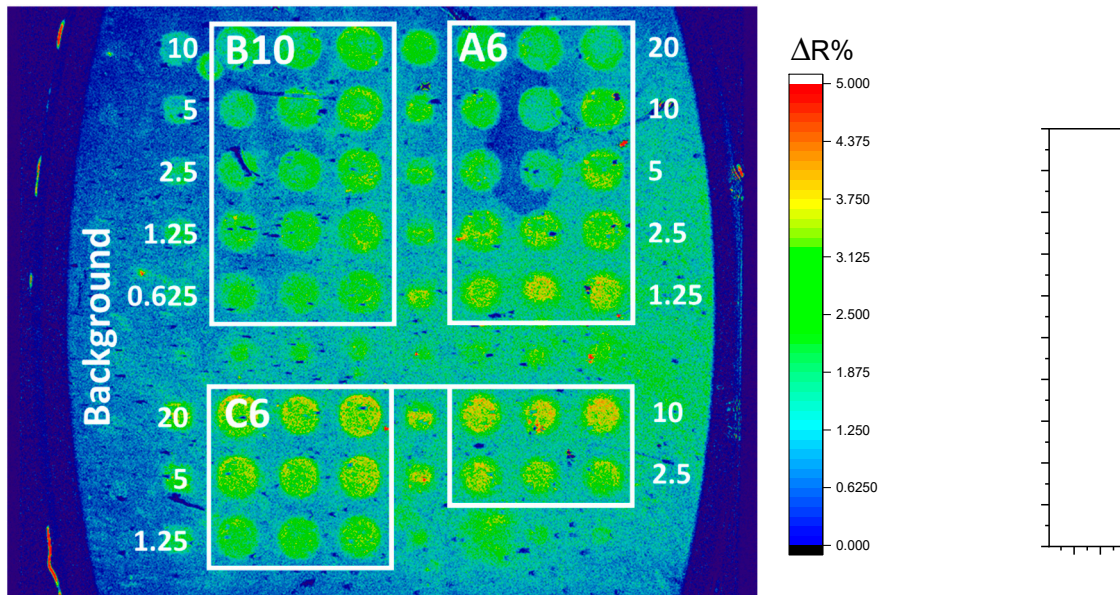

**Supplementary Figure 1.** Differential SPR image of spiegelmer microarray microspotted in triplicate from various concentration of L-DNA probe solutions (0.625-20  $\mu\text{M}$ ). The color of the spots changes with the amount of bound cTnI-T-C protein, as shown on the scale on the right.

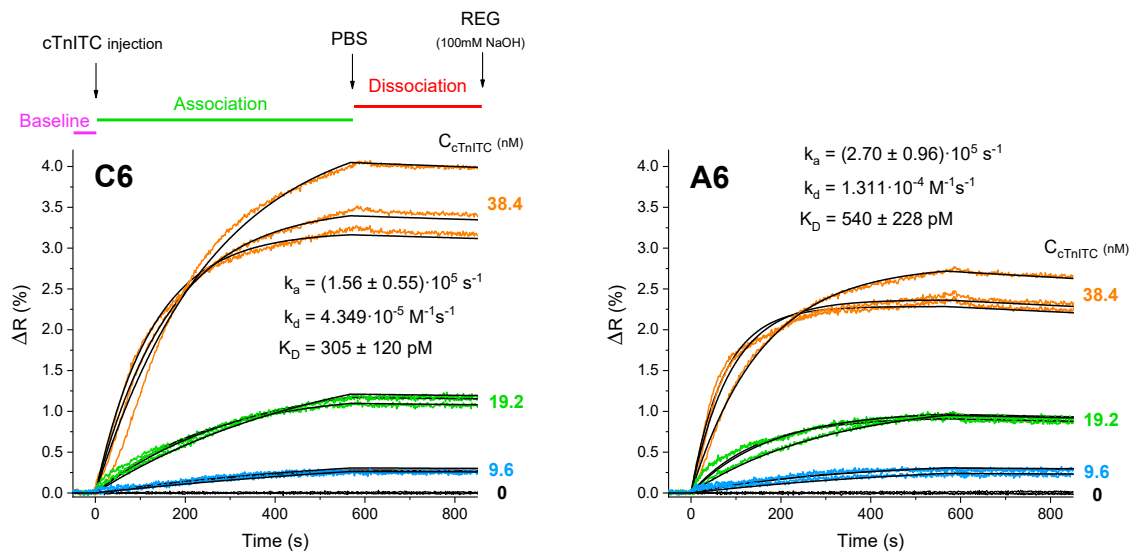

**Supplementary Figure 2.** Interaction curves upon injection of different concentration of the target protein (9.6, 19.2, 38.4 nM) recorded for C6 (left) and A6 (right) spiegelmer spots immobilized at 2.5  $\mu\text{M}$ . Kinetic curves were fitted one by one to each parallel spot (3 replicates) on the same SPRi chip.

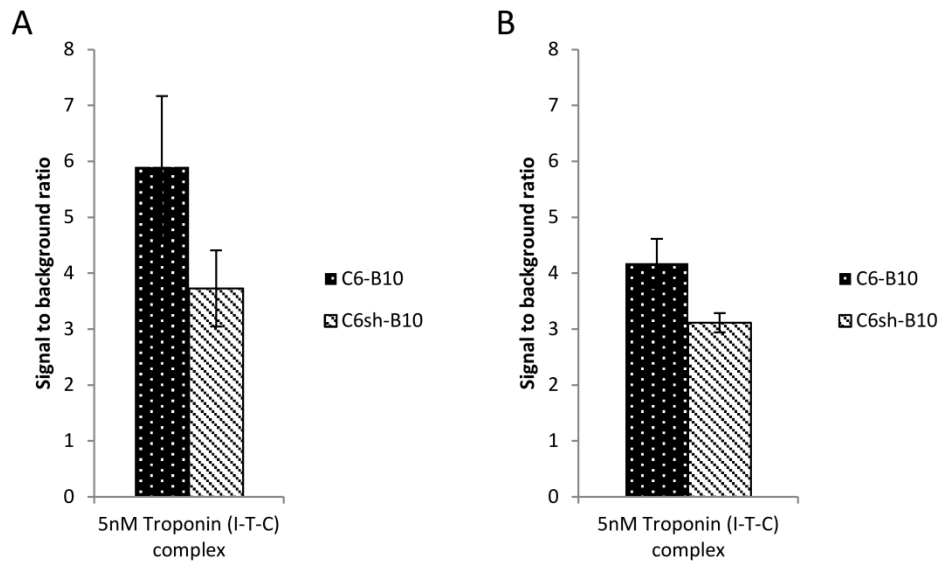

**Supplementary Figure 3:** The effect of spiegelmer truncation on the sandwich type assay. Selection buffer (A) or ten times diluted human plasma (B) was spiked with 5 nM (385 ng mL<sup>-1</sup>) ternary complex and analyzed by AlphaLisa.
